# Supplementary material for: Organic light emitting diodes with environmentally and thermally stable doped graphene electrodes
Source: Royal Society of Chemistry journal article supplement (doi:10.1039/c4tc01224k), 2014-07-21
Supplement: c4tc01224k1.pdf [file c4tc01224k1.pdf]

COMMUNICATION

## Organic light emitting diodes with environmentally and thermally stable doped graphene electrodes

Cite this: DOI: 10.1039/x0xx00000x

Arun Kuruvila,<sup>a</sup> Piran R. Kidambi,<sup>b</sup> Jens Kling,<sup>c</sup> Jakob B. Wagner,<sup>c</sup> John Robertson,<sup>b</sup>  
Stephan Hofmann,<sup>b</sup> and Jens Meyer<sup>a\*</sup>

Received 00th January 2012,  
Accepted 00th January 2012

DOI: 10.1039/x0xx00000x

www.rsc.org/

### Supplementary Information

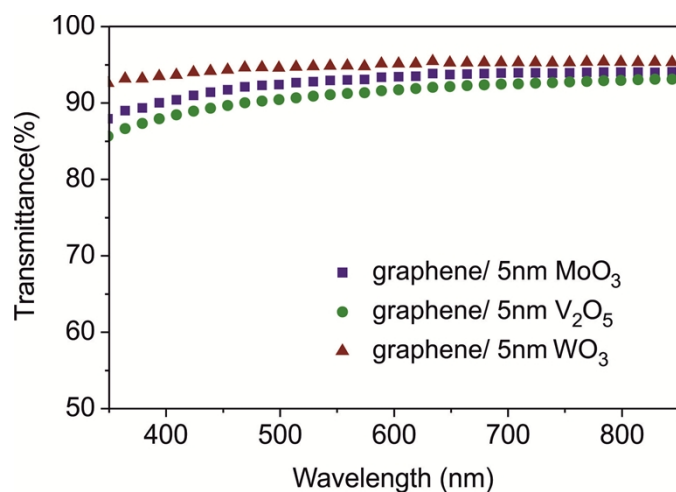

Fig S1: Transmission characteristics of monolayer graphene on glass with 5nm MoO<sub>3</sub>, 5nm V<sub>2</sub>O<sub>5</sub> and 5nm WO<sub>3</sub>, respectively.
